# Supplementary material for: Maternal lead exposure and premature rupture of membranes: a birth cohort study in China
Source: PubMed Central journal article supplement — BMJ Open. 2018 Jul 23;8(7):e021565. doi: 10.1136/bmjopen-2018-021565 (PMC6059302; doi:10.1136/bmjopen-2018-021565), 2018-07-23
Supplement: bmjopen-2018-021565supp001.pdf [file bmjopen-2018-021565supp001.pdf]

## Supplementary Materials

### Maternal Lead Exposure and Premature Rupture of Membranes: A

#### Birth Cohort Study in China

Sha Huang<sup>1</sup>, Wei Xia<sup>1</sup>, Xia Sheng<sup>1</sup>, Lin Qiu<sup>2</sup>, Bin Zhang<sup>2</sup>, Tian Chen<sup>1</sup>, Shunqing Xu<sup>1</sup>,  
and Yuanyuan Li<sup>1</sup>

#### Table of Contents

**Table S1** Risk of PROM and preterm PROM associated with the levels of Pb in maternal urine, after excluding intrauterine infection, vaginitis, cervicitis, pelvic inflammatory disease, vaginal bleeding, polyhydramnios, and fetal malposition (n = 6553).

**Table S2** Risk of PROM and preterm PROM associated with the levels of Pb in maternal urine, after excluding creatinine > 3 g/L (n = 7281).

**Table S1** Risk of PROM and preterm PROM associated with the levels of Pb in maternal urine, after excluding intrauterine infection, vaginitis, cervicitis, pelvic inflammatory disease, vaginal bleeding, polyhydramnios, and fetal malposition (n = 6553).

| Pb ( $\mu\text{g/gcreatinine}$ ) | case | OR <sup>a</sup> (95% CI) | OR <sup>b</sup> (95% CI) |
|----------------------------------|------|--------------------------|--------------------------|
| <b>PROM</b>                      |      |                          |                          |
| Tertile1 (< 2.65)                | 208  | 1.00                     | 1.00                     |
| Tertile2 (2.65–4.71)             | 245  | 1.20 (0.99, 1.46)        | 1.20 (0.98, 1.46)        |
| Tertile3 ( $\geq$ 4.71)          | 308  | 1.56 (1.29, 1.87)        | 1.55 (1.28, 1.87)        |
| <i>p</i> for trend               |      | < 0.01                   | < 0.01                   |
| <b>preterm PROM</b>              |      |                          |                          |
| Tertile1 (< 2.65)                | 33   | 1.00                     | 1.00                     |
| Tertile2 (2.65–4.71)             | 38   | 1.15 (0.72, 1.85)        | 1.15 (0.72, 1.84)        |
| Tertile3 ( $\geq$ 4.71)          | 53   | 1.62 (1.04, 2.51)        | 1.61 (1.04, 2.51)        |
| <i>p</i> for trend               |      | 0.02                     | 0.01                     |

Abbreviations: OR, odds ratio; CI, confidence interval.

<sup>a</sup> Unadjusted odds ratio.

<sup>b</sup> Adjusted for maternal age, family income, pre-BMI, parity, passive smoking and pregnancy-induced hypertension.

**Table S2** Risk of PROM and preterm PROM associated with the levels of Pb in maternal urine, after excluding creatinine > 3 g/L (n = 7281).

| Pb ( $\mu\text{g/gcreatinine}$ ) | case | OR <sup>a</sup> (95% CI) | OR <sup>b</sup> (95% CI) |
|----------------------------------|------|--------------------------|--------------------------|
| <b>PROM</b>                      |      |                          |                          |
| Tertile1 (< 2.66)                | 241  | 1.00                     | 1.00                     |
| Tertile2 (2.66–4.70)             | 290  | 1.23 (1.03, 1.47)        | 1.22 (1.02, 1.46)        |
| Tertile3 ( $\geq$ 4.70)          | 349  | 1.52 (1.27, 1.81)        | 1.51 (1.26, 1.80)        |
| <i>p</i> for trend               |      | < 0.01                   | < 0.01                   |
| <b>preterm PROM</b>              |      |                          |                          |
| Tertile1 (< 2.66)                | 37   | 1.00                     | 1.00                     |
| Tertile2 (2.66–4.70)             | 46   | 1.25 (0.81, 1.93)        | 1.24 (0.80, 1.92)        |
| Tertile3 ( $\geq$ 4.70)          | 64   | 1.74 (1.16, 2.62)        | 1.73 (1.15, 2.60)        |
| <i>p</i> for trend               |      | < 0.01                   | 0.01                     |

Abbreviations: OR, odds ratio; CI, confidence interval.

<sup>a</sup> Unadjusted odds ratio.

<sup>b</sup> Adjusted for maternal age, family income, pre-BMI, parity, passive smoking and pregnancy-induced hypertension.
